# Supplementary material for: Human β-defensin 2 kills Candida albicans through phosphatidylinositol 4,5-bisphosphate–mediated membrane permeabilization
Source: PubMed Central journal article supplement — Sci Adv. 2018 Jul 25;4(7):eaat0979. doi: 10.1126/sciadv.aat0979 (PMC6059731; doi:10.1126/sciadv.aat0979), 2018-07-25
Supplement: aat0979_SM.pdf [file aat0979_SM.pdf]

## Supplementary Materials for

### **Human $\beta$ -defensin 2 kills *Candida albicans* through phosphatidylinositol 4,5-bisphosphate-mediated membrane permeabilization**

Michael Jarva, Thanh Kha Phan, Fung T. Lay, Sofia Caria, Marc Kvansakul\*, Mark D. Hulett\*

\*Corresponding author. Email: m.kvansakul@latrobe.edu.au (M.K.); m.hulett@latrobe.edu.au (M.D.H.)

Published 25 July 2018, *Sci. Adv.* 4, eaat0979 (2018)

DOI: 10.1126/sciadv.aat0979

#### **This PDF file includes:**

Fig. S1. SEC-SAXS analysis of HBD-2.

Fig. S2. The three-dimensional structure of HBD-2 is important for its antifungal activity and liposome permeabilization.

Table S1. SAXS data collection and scattering-derived parameters.

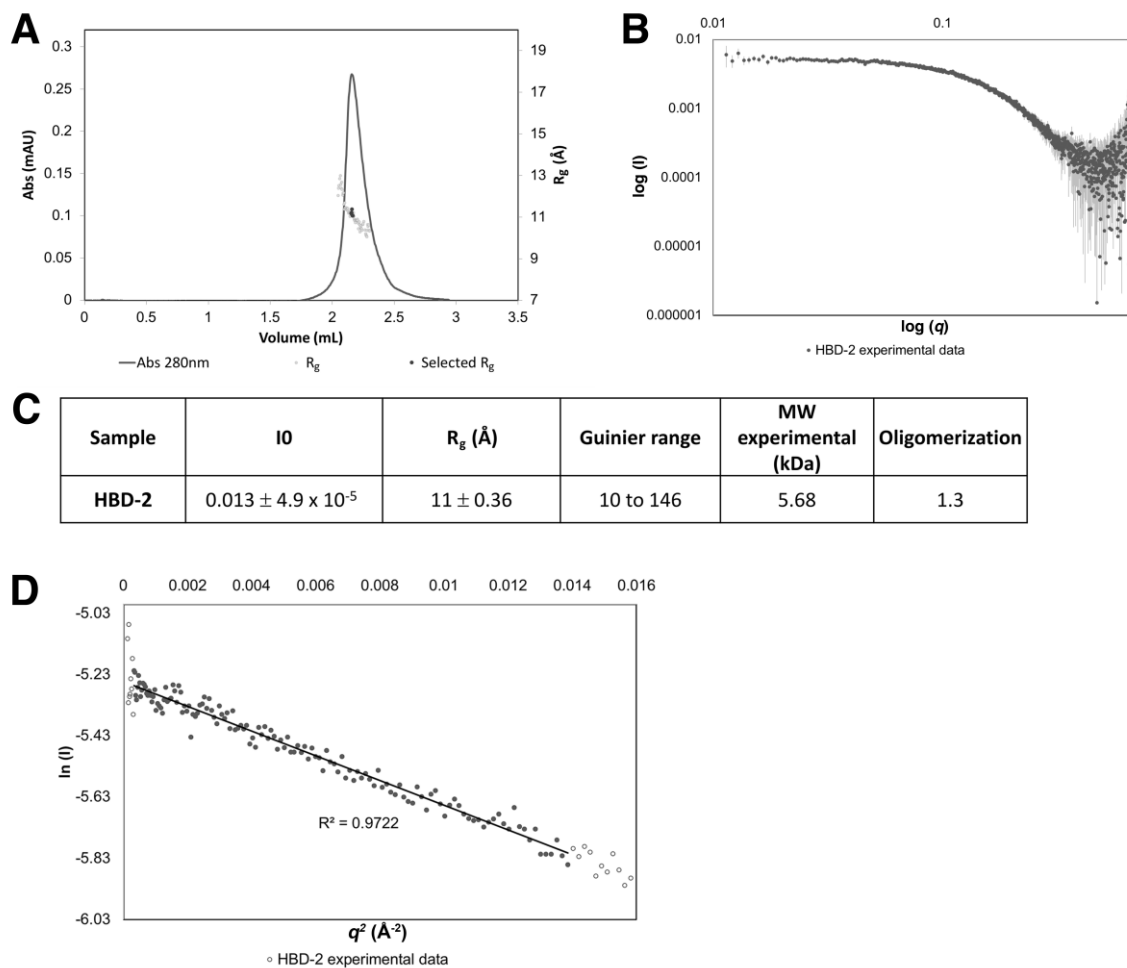

**Fig. S1. SEC-SAXS analysis of HBD-2.** (A) In-line size exclusion SAXS chromatogram of HBD-2. The dark dots represent the frames used for averaging the scattering profiles based on  $R_g$  (dots). (B) Log-log representation of HBD-2 scattering profile extracted from fractionated peaks obtained from in-line SEC-SAXS. (C) Oligomerization analyses of HBD-2 based on Guinier range. (D) Guinier plot of HBD-2 with Guinier range highlighted with dots.

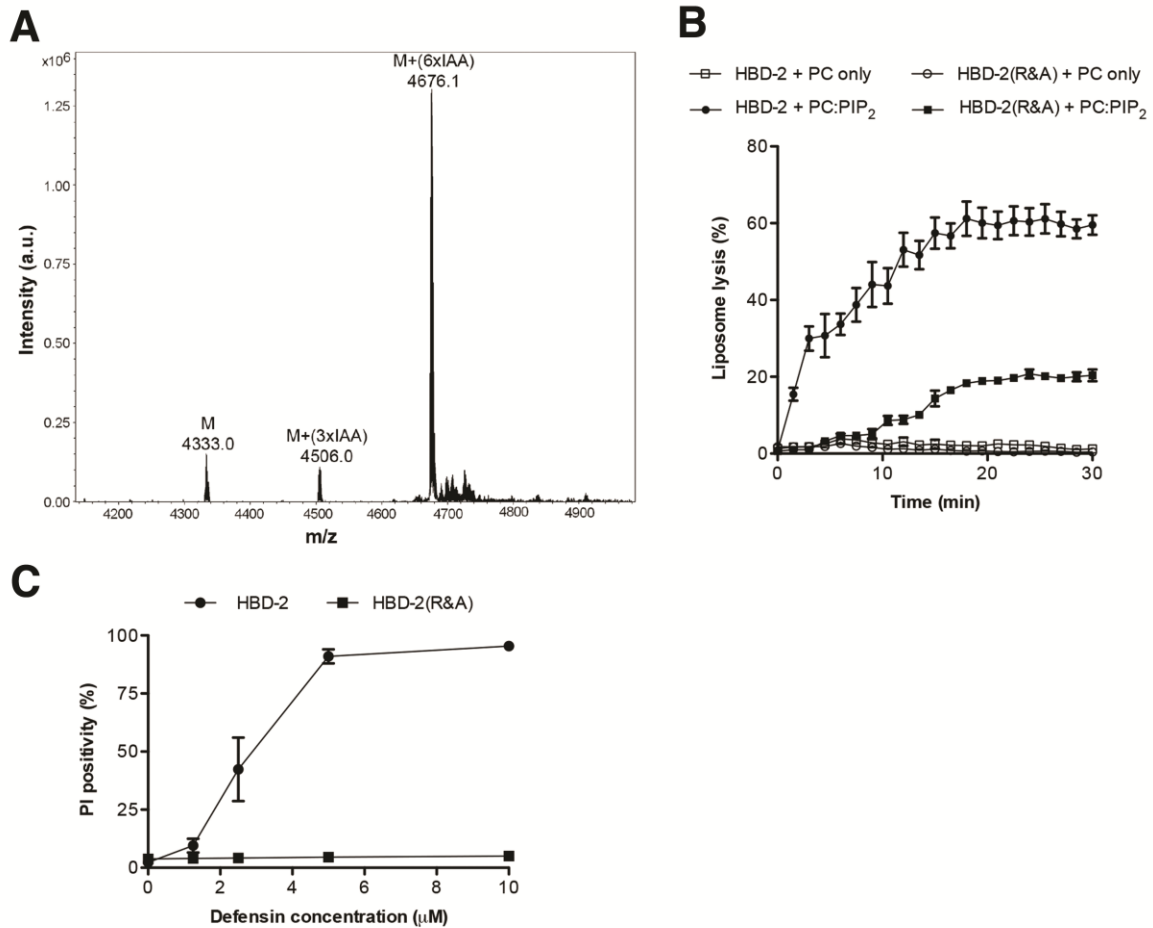

**Fig. S2. The three-dimensional structure of HBD-2 is important for its antifungal activity and liposome permeabilization.** (A) ESI-Q-TOF mass spectrum of reduced and alkylated HBD-2 (HBD-2(R&A)) sample with masses (M) and number of conjugated iodoacetamide (IAA) explicitly indicated. (B) Fungal cell permeabilization by HBD-2(R&A) in comparison to HBD-2. *C. albicans* was treated with defensins at indicated concentrations for 30 min, followed by PI staining prior to flow cytometry analysis. (C) Liposome lysis with 50  $\mu$ M HBD-2 or HBD-2(R&A) using calcein-encapsulated PC only or PC:PIP<sub>2</sub> liposomes. Liposome lysis was normalized against triton X-100 treatment. Data in (B) and (C) represent mean $\pm$ SEM of three independent experiments.

**Table S1. SAXS data collection and scattering-derived parameters.**

| HBD-2                                                     |                                            |
|-----------------------------------------------------------|--------------------------------------------|
| Data collection parameters                                |                                            |
| Instrument                                                | SAXS/WAXS beamline, Australian Synchrotron |
| Beam geometry ( $\mu\text{m}$ )                           | 250 x 450                                  |
| Fractional sample flow rate                               | 0.5                                        |
| Wavelength (keV)                                          | 12                                         |
| Flux ( $\text{ph.s}^{-1}$ )                               | $6 \times 10^{12}$                         |
| $q$ range ( $\text{\AA}^{-1}$ )                           | 0.011-0.65                                 |
| Exposure time (s)                                         | 1 (detector integration)                   |
| Temperature (K)                                           | 299.15                                     |
| Structural parameters †                                   |                                            |
| $I(0)$ (from Guinier) ( $\text{cm}^{-1}$ )                | $0.013 \pm 4.85 \times 10^{-5}$            |
| $R_g$ (from Guinier) ( $\text{\AA}$ )                     | $11.00 \pm 0.36$                           |
| Molecular-mass determination †                            |                                            |
| Partial specific volume ( $\text{cm}^3 \text{g}^{-1}$ )   | 0.739                                      |
| Contrast ( $\Delta\rho \times 10^{10} \text{cm}^{-2}$ ) § | 2.897                                      |
| Molecular mass $M_r$ [from $I(0)$ ] (kDa) §               | 5.68                                       |
| Calculated monomeric $M_r$ from sequence (kDa)            | 4.33                                       |
| Software employed                                         |                                            |
| Primary data reduction                                    | SAXS/WAXS beamline software                |
| Data processing                                           | <i>PRIMUS</i>                              |
| Theoretical scattering calculations                       | <i>CRYSOL</i>                              |
| Three-dimensional graphics representation                 | <i>PyMOL</i>                               |
| Graphics representation                                   | <i>EXCEL</i>                               |

† Reported for peaks (Fig. S1) § Determined with MULCh (Whitten *et al.*, 2008)
